# Supplementary material for: A versatile dendritical amplification photoelectric biosensing platform based on Bi2S3 nanorods and a perylene-based polymer for signal “on” and “off” double detection of DNA
Source: Royal Society of Chemistry journal article supplement (doi:10.1039/d0an01040e), 2020-01-01
Supplement: d0an01040e1.pdf [file d0an01040e1.pdf]

## Supporting Information

### **Versatile dendritical amplification photoelectric biosensing platform based on Bi<sub>2</sub>S<sub>3</sub> nanorods and perylenebased polymer for signal “on” and “off” double detection of DNA**

Hongkun Li, Guifen Jie\*

*Key Laboratory of Optic-electric Sensing and Analytical Chemistry for Life Science, MOE; Shandong Key Laboratory of Biochemical Analysis; Key Laboratory of Analytical Chemistry for Life Science in Universities of Shandong; College of Chemistry and Molecular Engineering. Qingdao University of Science and Technology, Qingdao 266042, PR China*

#### **Table of Contents**

|                                     |     |
|-------------------------------------|-----|
| <b>Experimental section</b> .....   | S-2 |
| <b>Results and discussion</b> ..... | S-3 |

---

\*Corresponding author.

\*E-mail address: guifenjie@126.com.

## Experimental section

### *Chemicals and Reagents*

Phi29 DNA polymerase, T<sub>4</sub> DNA ligase, Exonuclease I (Exo I), Exonuclease (Exo III), 10 × exonuclease I buffer, 10 × exonuclease III buffer and dNTPs were purchased from New England Biolabs Ltd. (Beijing, China). L(+)-Ascorbic acid (AA) was purchased from Sinopharm Chemical Reagent Co. Trichloroauric acid trihydrate (HAuCl<sub>4</sub>·3H<sub>2</sub>O) were purchased from Alfa Aesar (Tianjin) Chemical Co.. Bi<sub>2</sub>(NO<sub>3</sub>)<sub>3</sub>·5H<sub>2</sub>O, Mn (III) meso-Tetra (N-methyl-4-pyridyl) porphine pentachloride (MnPP) was purchased from Sigma-Aldrich (St. Louis, MO, USA). Na<sub>2</sub>S·9H<sub>2</sub>O and perylene-3,4,9,10-tetracarboxylic dianhydride (PTDA) were purchased from Aladdin Co., Ltd. (Shanghai, China). All reagents were of analytical grade and used as received. Ultrapure water was used throughout the experiment from a Millipore water purification system (≥18 MΩ, Milli-Q, Millipore). All the DNA sequences were synthesized and purified by Sangon Biotech (Shanghai) Co., Ltd. The DNA sequences used in this work are listed in Table S1.

**Table S1. The Sequences of DNA**

| Name   | From (5'-3')                                                                |
|--------|-----------------------------------------------------------------------------|
| HP     | TCTCAGATGGATTCGGCGTGAAT*T*T*T*TTCACGCCGAATCCATC<br>TGAGAGGCCGTCTATGCGTGAAGT |
| Target | CAG TTC ACG CAT AGA CGG* C*C*                                               |
| PD     | TCGATCTCAGATCCTAAGCCGCACCCAAAGACTG                                          |
| AS     | GATCGACAGTCT                                                                |
| H1     | TCTGACAGCTAGAGTCTAGGATTCGGCGTGGGTTTTTCACGCCGA<br>ATCCATCTGAGATTTTTTT-SH     |
| H2     | AACCCACGCCGAATGGGGGGATTCGGCG                                                |
| H3     | ATTCGGCGTGGGTTCGCCGAATCCCCC                                                 |

### *Apparatus*

Transmission electron micrograph (TEM) image was acquired using a JEM-2100 instrument (JEOL, Japan). Atomic force microscope (AFM) images were recorded on a Dimension FastScan TM Atomic

force microscope (Bruker AXS GmbH, Germany). All of the photoelectrochemical (PEC) signals were recorded on a PEAC 200A PEC analyzer (Aida Hengyi Technology Development Co., Ltd., Tianjin, China). Electrochemical impedance spectroscopy (EIS) was measured on CHI 660E electrochemical workstation (Shanghai Chenhua Instrument Co., China). The reference electrode was an Ag/AgCl electrode, the working electrode was a gold electrode (5 mm), and a Pt wire was the counter electrode. UV-vis absorption spectra were measured with Lambda 35 UV Visible Spectrometer (Japan). Polyacrylamide gel electrophoresis (PAGE) analysis was performed on the Beijing JUNYI electrophoresis analyzer and imaged on the Biorad ChemDoc XRS (USA). X-ray photoelectron spectroscopy (XPS) was obtained on Multifunctional imaging electron spectrometer (Thermo ESCALAB 250Xi). JSM-6700F field emission scanning electron microscopy (FESEM, Japan). X-ray diffraction (XRD) analysis was performed with Cu K $\alpha$  radiation on a D/Max 2500V/PC Rigaku diffractometer. Fourier transform infrared (FT-IR) spectra were obtained on a BRUKER OPUS 80V FT-IR spectrometer (BRUKER, Karlsruhe, Germany).

#### *The process of Gel Electrophoresis*

At first, we prepared 50 $\times$ TAE buffer (tris 24.2 g, EDTA 3.72 g, glacial acetic acid 5.71 mL, adding water to 100 mL). Next, we take 10 mL centrifugal tube and add water (4256  $\mu$ L), 40% Polyacrylamide gel (3500  $\mu$ L), 50 $\times$ TAE buffer (160  $\mu$ L), APS (80  $\mu$ L), TEMED (4  $\mu$ L), then we pour it into the electrophoresis tank, and insert the comb into the electrophoresis tank, holding it for about 2 hours. We moved the whole electrophoresis tank into the tank, pulled out the comb, and added the 1 $\times$ TAE buffer to 2/3 of the tank. The electrophoresis was carried in 1 $\times$  tris-acetic acid EDTA (TAE) (pH 8.0) at 180 V constant voltage for 3 min and 135 V for 1.5 h. After EB staining, the gel was scanned using a gel imaging analyzer (Saizhi Venture Technology Co., Ltd. Beijing, China).

#### **Results and discussion**

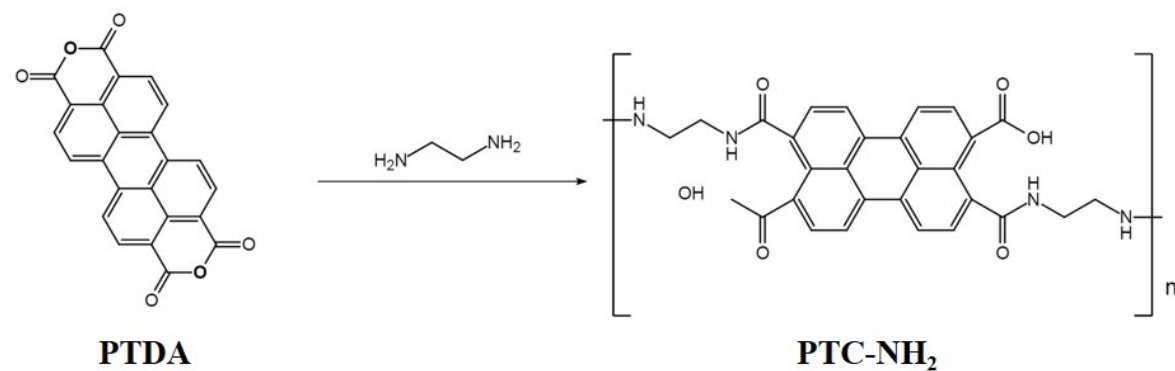

**Scheme S1.** Synthetic illustration of PTC-NH<sub>2</sub> samples.

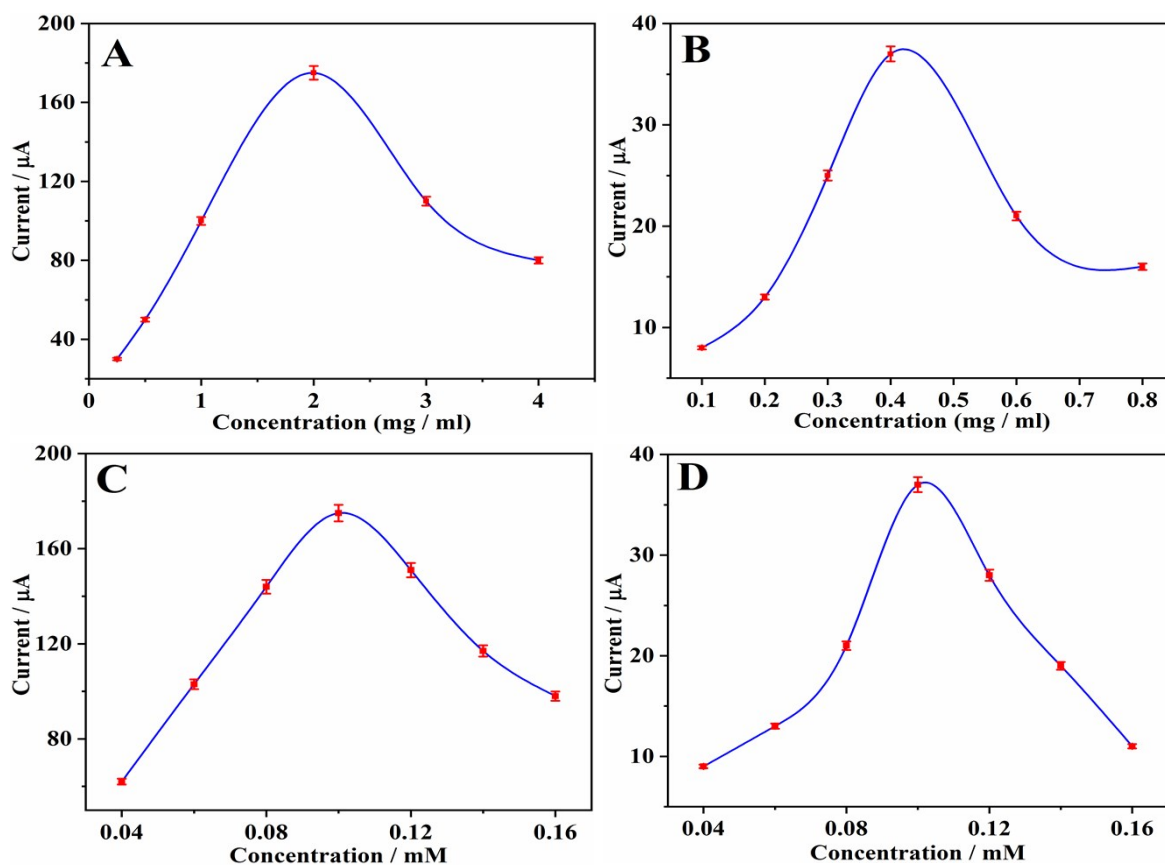

**Fig. S1.** The optimization for concentration of Bi<sub>2</sub>S<sub>3</sub> (A), PTC-NH<sub>2</sub> (B), AA for Bi<sub>2</sub>S<sub>3</sub> (C), AA for PTC-NH<sub>2</sub> (D).

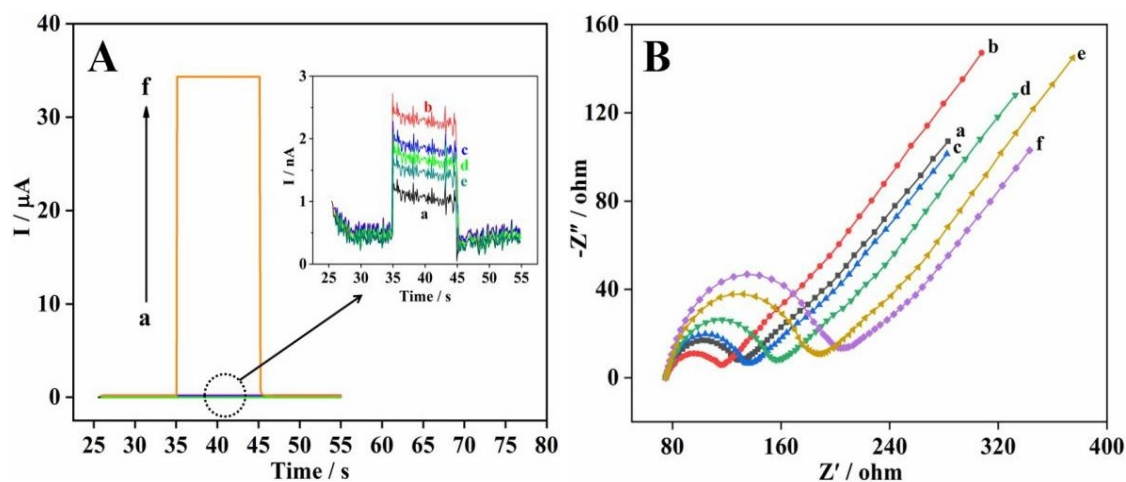

**Fig. S2.** (A) Photocurrent responses and (B) EIS of the “signal on” PEC biosensor at different stages. (a) bare ITO, (b) ITO/Au NPs, (c) ITO/Au NPs/H1/MCH, (d) ITO/Au NPs/H1/MCH/PC/RC, (e) ITO/Au NPs/H1/MCH/PC/RC/H2+H3, (f) ITO/Bi<sub>2</sub>S<sub>3</sub>/AuNPs/H1/MCH/PC/RC/H2+H3/PTC-NH<sub>2</sub> in the presence of target DNA (10 nM).

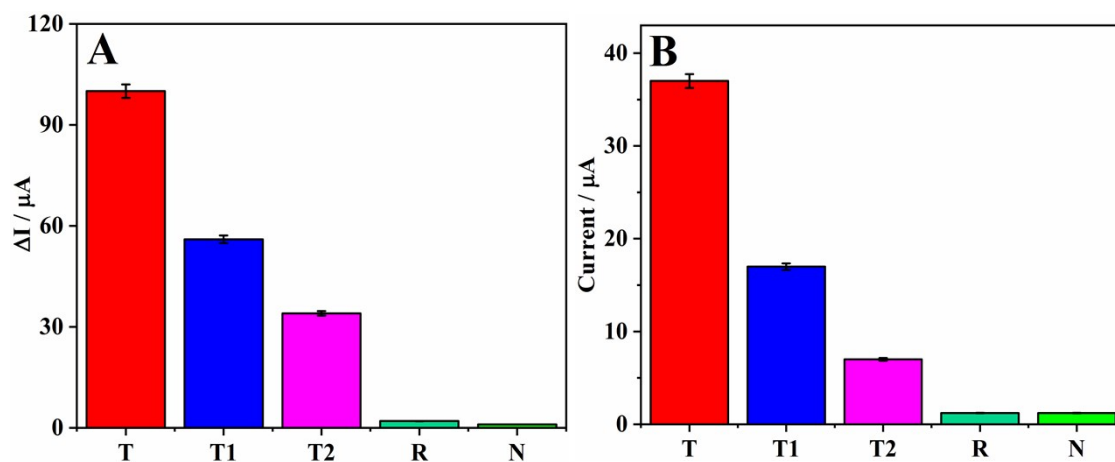

**Fig. S3.** The selectivity of the “signal off” (A), and “signal on” (B) PEC biosensor.
